# Supplementary material for: Identification and characterization of a new sulfoacetaldehyde reductase from the human gut bacterium Bifidobacterium kashiwanohense
Source: PubMed Central journal article supplement (PMC6616044; doi:10.1042/bsr20190715), 2019-06-20

**A**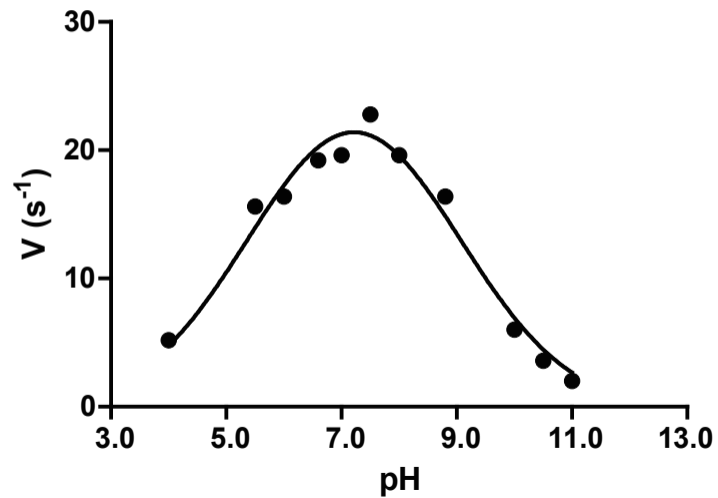**B**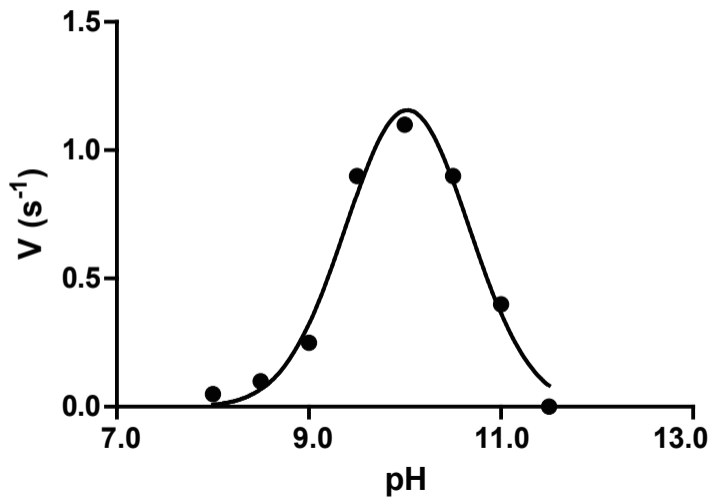

**A**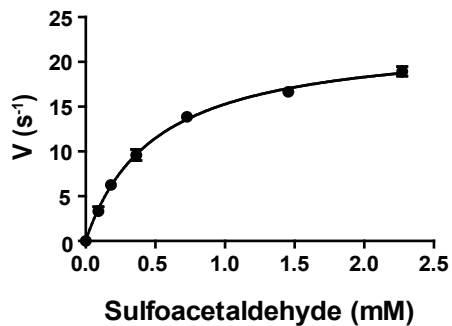**B**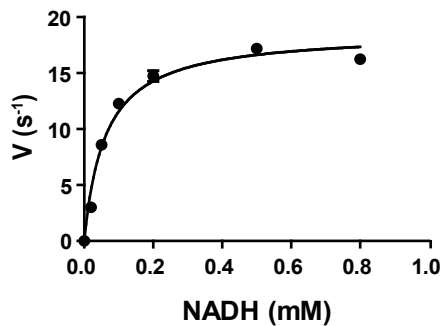**C**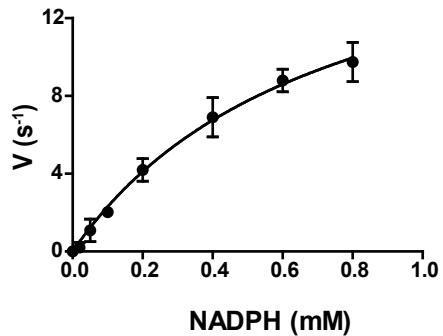**D**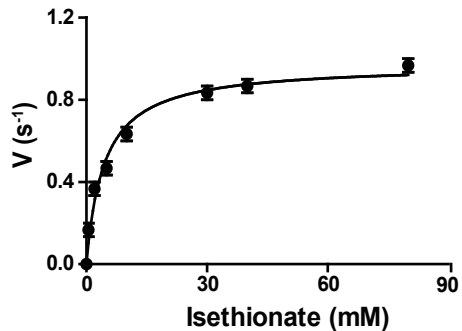**E**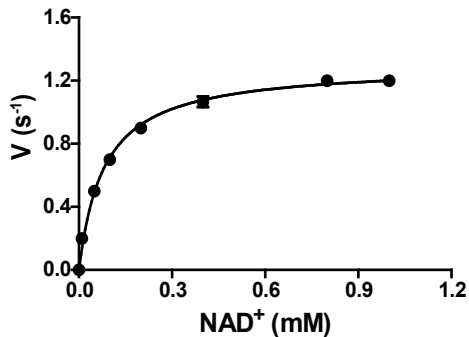**F**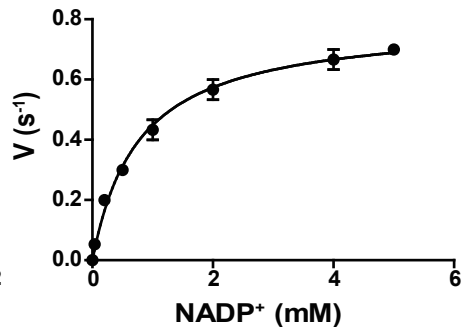

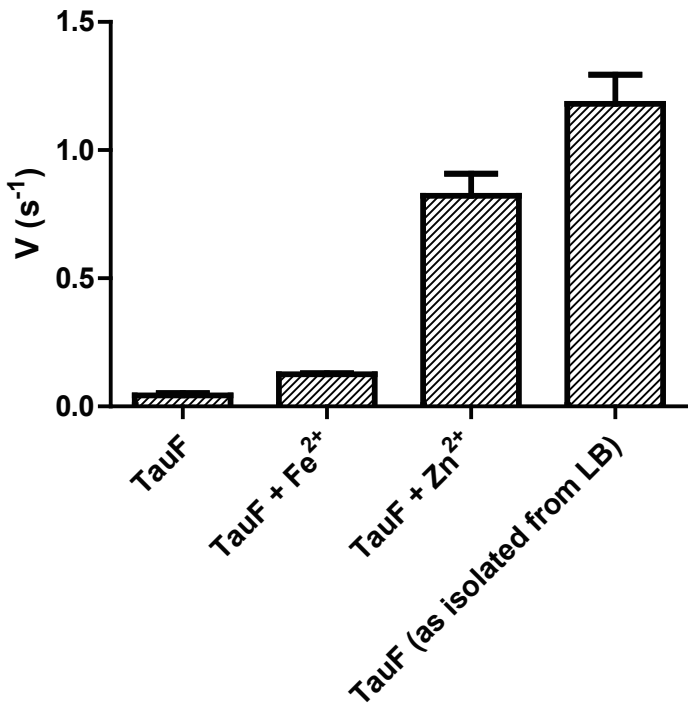

Supplement: bsr20190715_Supp1.pdf [file bsr20190715_Supp1.pdf]
